# Supplementary material for: Identification of Genomic Signatures for Colorectal Cancer Survival Using Exploratory Data Mining
Source: Int J Mol Sci. 2024 Mar 12;25(6):3220. doi: 10.3390/ijms25063220 (PMC10970183; doi:10.3390/ijms25063220)
Supplement: Supplementary file 1 [file ijms-25-03220-s001.zip › Supplementary_Table_S4_EDITED.xlsx]

## Sheet: CRC_stage_02
Table S4. Marker lists for selected genomic signatures in each subgroup.
CRC Stage 2 genomic signatures
Signature ID	MG02PS04 - Class 01	MG02PS04 - Class 02	MG02PS03 - Class 02	MG02PS04 - Class 02	MG02PS05 - Class 01
Class	Mutation - Positive	Mutation - Negative	Mutation - Negative	Mutation - Negative	Mutation - Positive
# genes	56	30	40	30	6
			40	30	6
Gene list	GATA6	AURKA	AURKA	AURKA	TMPRSS2
	AURKA	BCL2L1	SDC4	BCL2L1	ERG
	ASXL1	ASXL1	ASXL1	ASXL1	U2AF1
	BCL2L1	GNAS	BCL2L1	GNAS	LTK
	SMAD4	SRC	SRC	SRC	RAD51
	SMAD2	ARFRP1	GNAS	ARFRP1	TYRO3
	IRF2	ZNF217	ZNF217	ZNF217
	NFKBIA	SMAD4	ARFRP1	SMAD4
	IDH2	SMAD2	SMAD4	SMAD2
	IGF1R	BCL2	SMAD2	BCL2
	NTRK3	GATA6	BCL2	GATA6
	FLT1	MAP2K4	GATA6	MAP2K4
	CUL4A	FLCN	MAP2K4	FLCN
	JAK2	ALOX12B	FLCN	ALOX12B
	CDKN2A	TP53	ALOX12B	TP53
	PAX5	AURKB	TP53	AURKB
	CDKN2B	FLT1	AURKB	FLT1
	TEK	BRCA2	FLT1	BRCA2
	FBXW7	FLT3	BRCA2	FLT3
	MTAP	CDK8	FLT3	CDK8
	SDC4	CUL4A	CDK8	CUL4A
	SRC	FGF14	RB1	FGF14
	GNAS	GATA4	DIS3	GATA4
	ARFRP1	IRS2	CUL4A	IRS2
	BCL2	DIS3	FGF14	DIS3
	BRCA2	RB1	IRS2	RB1
	FLT3	PPP2R2A	PPP2R2A	PPP2R2A
	CDK8	PMS2	GATA4	PMS2
	FGF14	RAC1	PMS2	RAC1
	ZNF217	CARD11	CARD11	CARD11
	IRS2		RAC1
	GATA4		IKZF1
	TYRO3		RAD21
	RAD51		EPHB4
	LTK		AKT1
	PMS2		CDK6
	RAC1		FGFR1
	CARD11		ZNF703
	RB1		MET
	DIS3		SMO
	PPP2R2A
	XRCC2
	KEL
	BRAF
	MET
	EZH2
	SMO
	EPHB4
	CDK6
	GRM3
	HGF
	ZNF703
	IKZF1
	FGFR1
	WHSC1L1
	EGFR

## Sheet: CRC_stage_03
Table S4. Marker lists for selected genomic signatures in each subgroup.
CRC Stage 3 genomic signatures
Signature ID	MG03PS19 - Class 01	MG03PS19 - Class 02	MG03PS18 - Class 02	MG03PS19 - Class 01	MG03PS19 - Class 02
Class	Mutation - Positive	Mutation - Negative	Mutation - Negative	Mutation - Positive	Mutation - Negative
# genes	11	5	4	11	5
Gene list	IDH1	IDH1	CSF1R	IDH1	IDH1
	ERBB4	CASP8	CTNNA1	ERBB4	CASP8
	CASP8	ERBB4	PDGFRB	CASP8	ERBB4
	CUL3	CUL3	CD74	CUL3	CUL3
	BARD1	BARD1		BARD1	BARD1
	SF3B1			SF3B1
	PDCD1			PDCD1
	NOTCH2			NOTCH2
	HSD3B1			HSD3B1
	FH			FH
	AKT3			AKT3

## Sheet: CRC_stages_02_and_03
Table S4. Marker lists for selected genomic signatures in each subgroup.
CRC Stage 2 and 3 genomic signatures
Signature ID	MG23PS19 - Class 01	MG23PS19 - Class 02	MG23PS20 - Class 01
Class	Mutation - Positive	Mutation - Negative	Mutation - Positive
# genes	61	33	7
Gene list	LTK	ASXL1	RAD51
	RAD51	BCL2L1	LTK
	NFKBIA	SMAD4	ERG
	BCL2L2	ZNF217	TMPRSS2
	PARP2	GNAS	TYRO3
	APC	SRC	U2AF1
	ARID1A	BCL2	AKT1
	ERRFI1	AURKA
	MTOR	ARFRP1
	SPEN	SMAD2
	SDHB	GATA6
	U2AF1	FLT3
	TNFRSF14	FLT1
	ERG	DIS3
	TMPRSS2	FLCN
	SNCAIP	CDK8
	MTAP	MAP2K4
	SMAD4	BRCA2
	BCL2	RB1
	SMAD2	AURKB
	GATA6	ALOX12B
	EPHB4	IRS2
	FLCN	TP53
	TYRO3	FGF14
	FLT3	CUL4A
	FLT1	PPP2R2A
	ASXL1	IKZF1
	BCL2L1	RAC1
	MAP2K4	PMS2
	SMO	CARD11
	AURKB	EPHB4
	ALOX12B	GATA4
	TP53	SMO
	CDK6
	GRM3
	HGF
	IKZF1
	SDC4
	ZNF217
	GNAS
	SRC
	AURKA
	DIS3
	ARFRP1
	CDK8
	BRCA2
	RB1
	IRS2
	FGF14
	CUL4A
	KEL
	XRCC2
	BRAF
	MET
	EZH2
	RAC1
	CARD11
	PMS2
	PPP2R2A
	GATA4
	EGFR
