# Supplementary material for: Identification of Genomic Signatures for Colorectal Cancer Survival Using Exploratory Data Mining
Source: Int J Mol Sci. 2024 Mar 12;25(6):3220. doi: 10.3390/ijms25063220 (PMC10970183; doi:10.3390/ijms25063220)
Supplement: Supplementary file 1 [file ijms-25-03220-s001.zip › Supplementary_Table_S7.xlsx]

## Sheet: coadread_tcga++CNA++output_pane
Supplementary Table S7. Mutation frequency of genes in signature in training and validation datasets.
Training sample set
genes	Cytoband	CNA	Profiled Samples	Total_Patients	Freq
ALOX12B	17p13.1	HOMDEL	3	378	0.008
ARFRP1	20q13.33	AMP	22	378	0.058
ASXL1	20q11.21	AMP	29	378	0.077
AURKA	20q13.2	AMP	28	378	0.074
AURKB	17p13.1	HOMDEL	3	378	0.008
BCL2	18q21.33	HOMDEL	12	378	0.032
BCL2L1	20q11.21	AMP	30	378	0.079
BRCA2	13q13.1	AMP	9	378	0.024
CDK8	13q12.13	AMP	15	378	0.04
CDK8	13q12.13	HOMDEL	1	378	0.003
CUL4A	13q34	AMP	13	378	0.034
CUL4A	13q34	HOMDEL	1	378	0.003
DIS3	13q21.33	AMP	7	378	0.019
FGF14	13q33.1	HOMDEL	1	378	0.003
FGF14	13q33.1	AMP	10	378	0.026
FLCN	17p11.2	HOMDEL	2	378	0.005
FLT1	13q12.3	AMP	13	378	0.034
FLT3	13q12.2	AMP	18	378	0.048
GATA4	8p23.1	HOMDEL	18	378	0.048
GATA4	8p23.1	AMP	1	378	0.003
GATA6	18q11.2	HOMDEL	1	378	0.003
GATA6	18q11.2	AMP	1	378	0.003
GNAS	20q13.32	AMP	28	378	0.074
IRS2	13q34	AMP	13	378	0.034
IRS2	13q34	HOMDEL	1	378	0.003
MAP2K4	17p12	HOMDEL	7	378	0.019
PPP2R2A	8p21.2	HOMDEL	18	378	0.048
RAC1	7p22.1	AMP	1	378	0.003
RB1	13q14.2	AMP	8	378	0.021
RB1	13q14.2	HOMDEL	1	378	0.003
SDC4	20q13.12	AMP	28	378	0.074
SMAD2	18q21.1	HOMDEL	8	378	0.021
SMAD2	18q21.1	AMP	1	378	0.003
SMAD4	18q21.2	HOMDEL	27	378	0.071
SRC	20q11.23	HOMDEL	1	378	0.003
SRC	20q11.23	AMP	22	378	0.058
TP53	17p13.1	HOMDEL	5	378	0.013
ZNF217	20q13.2	AMP	26	378	0.069

## Sheet: AACR_Project_GENIE_BPC_CRC
Supplementary Table S7. Mutation frequency of genes in signature in training and validation datasets.
Validation sample set
genes	Cytoband	CNA	Profiled Samples	Total	Freq
ALOX12B	17p13.1	HOMDEL	1	513	0.002
ARFRP1	20q13.33	AMP	12	59	0.203
ASXL1	20q11.21	AMP	27	662	0.041
AURKA	20q13.2	AMP	25	662	0.038
AURKB	17p13.1	HOMDEL	2	662	0.003
BCL2	18q21.33	HOMDEL	8	662	0.012
BCL2L1	20q11.21	AMP	30	662	0.045
BRCA2	13q13.1	AMP	13	662	0.02
CARD11	7p22.2	AMP	2	662	0.003
CDK8	13q12.13	AMP	21	520	0.04
DIS3	13q21.33	AMP	9	662	0.014
FGF14	13q33.1	AMP	8	59	0.136
FLCN	17p11.2	HOMDEL	2	662	0.003
FLT1	13q12.3	AMP	31	662	0.047
FLT3	13q12.2	AMP	35	662	0.053
GATA4	8p23.1	HOMDEL	3	350	0.009
GATA6	18q11.2	AMP	2	350	0.006
GNAS	20q13.32	AMP	30	662	0.045
IRS2	13q34	AMP	19	371	0.051
MAP2K4	17p12	HOMDEL	7	662	0.011
PMS2	7p22.1	AMP	1	662	0.002
RAC1	7p22.1	AMP	4	520	0.008
RB1	13q14.2	AMP	12	662	0.018
SMAD2	18q21.1	HOMDEL	9	662	0.014
SMAD2	18q21.1	AMP	1	662	0.002
SMAD4	18q21.2	HOMDEL	20	662	0.03
SRC	20q11.23	AMP	28	513	0.055
TP53	17p13.1	HOMDEL	4	662	0.006
ZNF217	20q13.2	AMP	15	350	0.043
